# Supplementary material for: An improved assay for the spectrophotometric determination of chondroitinase ABC activity
Source: Royal Society of Chemistry journal article supplement (doi:10.1039/c3nj00168g), 2013-01-01
Supplement: c3nj00168g.pdf [file c3nj00168g.pdf]

## An Improved Assay for the Spectrophotometric Determination of Chondroitinase ABC Activity

Tristan D. Clemons<sup>a</sup>, Melinda Fitzgerald<sup>b</sup>, Sarah A. Dunlop<sup>b</sup>, Alan R. Harvey<sup>c</sup>, K. Swaminathan Iyer<sup>\*a</sup>, and Keith A. Stubbs<sup>\*a</sup>

Supporting Information

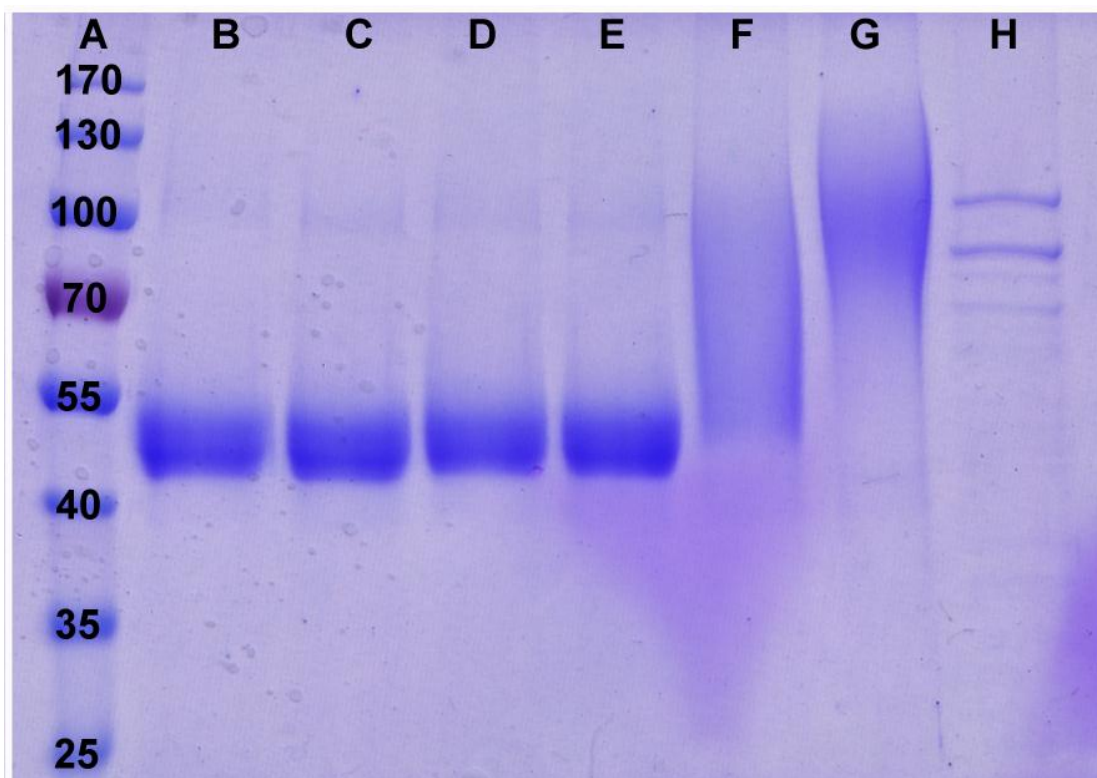

**Figure S1** – SDS-PAGE analysis of degradation products from heat treated chABC alone, with decorin as substrate (i.e. no trehalose added). A) Ladder, B) 0 days, C) 5 days, D) 10 days, E) 15 days, F) 20 days chABC heat treatment at 37 °C, G) decorin with PBS substrate control and H) chABC with PBS control. Dense bands at approximately 55 kDa correlate to the decorin core protein. A diffuse band correlates to the native sulphated glycosaminoglycan side chain decorated core protein illustrated by lane F and G, 20 days of chABC heat treatment and control decorin respectively.

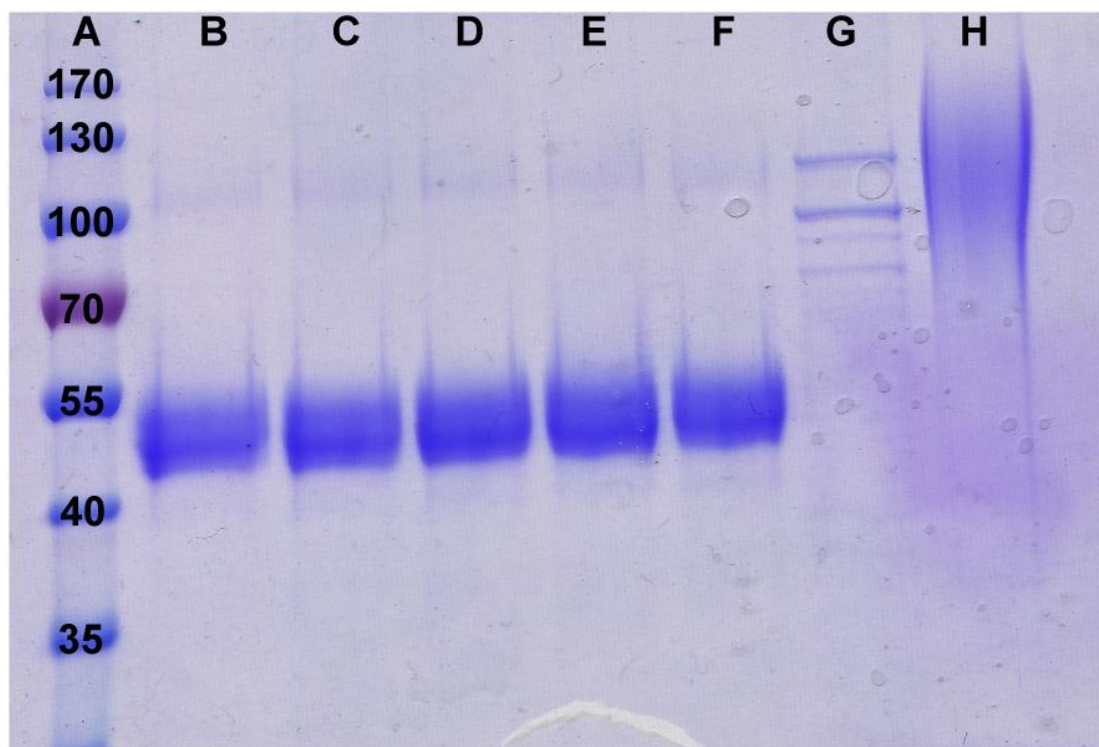

**Figure S2** – SDS-PAGE analysis of degradation products from heat treated chABC in the presence of trehalose, with decorin as substrate. A) Ladder, B) 0 days, C) 5 days, D) 10 days, E) 15 days, F) 20 days chABC + trehalose heat treatment at 37 °C, G) chABC with trehalose control and H) decorin with trehalose substrate control. Dense bands at approximately 55 kDa correlate to the decorin core protein. A diffuse band correlates to the native sulphated glycosaminoglycan side chain decorated core protein illustrated by lane H decorin + trehalose control.

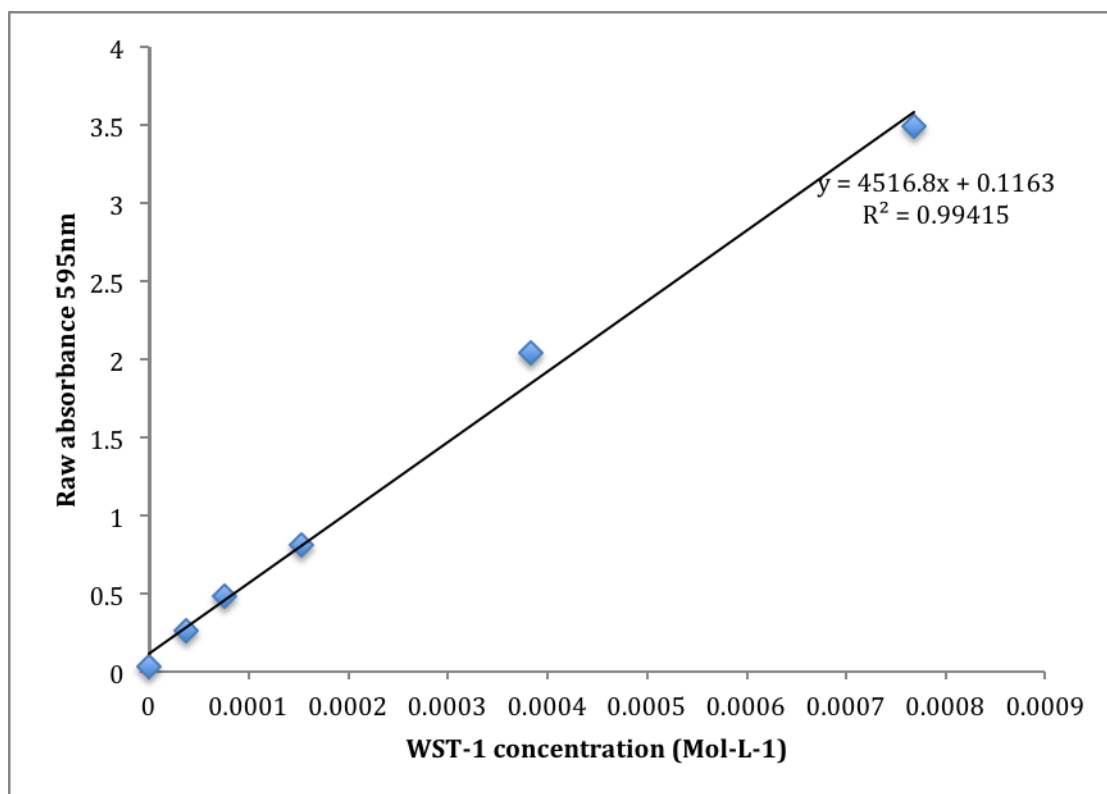

**Figure S3** – Standard curve used for the calculation of WST-1 molar absorption coefficient.
